# Supplementary material for: Phytochemical Profile, GC-MS Profiling and In Vitro Evaluation of Some Biological Applications of the Extracts of Origanum syriacum L. and Cousinia libanotica D.C.
Source: MDPI journal article supplement (doi:10.3390/plants13010137), 2024-01-03
Supplement: s1 [file s1]

(Article)

# Phytochemical profile, GC-MS profiling and *In vitro* evaluation of some biological applications of the extracts of *Origanum syriacum* L. and *Cousinia libanotica* D.C.

Michella Dawra <sup>1,3</sup>, Jalloul Bouajila <sup>1,\*</sup>, Marc El Beyrouthy <sup>2</sup>, Patricia Taillandier <sup>1</sup>, Nancy Nehme <sup>3</sup> and Youssef El Rayess <sup>2,\*</sup>

<sup>1</sup> Laboratoire de Génie Chimique, Université de Toulouse, CNRS, INPT, UPS, Toulouse, France

<sup>2</sup> Department of Agriculture and Food Engineering, School of Engineering, Holy Spirit University of Kaslik, B.P. 446, Jounieh, Lebanon

<sup>3</sup> Faculty of Agricultural Engineering and Veterinary Medicine, Lebanese University, Dekwaneh, Lebanon

\* Correspondence: jalloul.bouajila@univ-tlse3.fr. (J.B); youssefrayess@usek.edu.lb (Y.E.R) ; Tel.: +961-766-43765 (Y.E.R.)

## Supplementary materials

**Table S1.** Identification of the volatile compounds of *Origanum syriacum* and *Cousinia libanotica* extracts by Gas Chromatography-Mass spectrometry“GC-MS” before and after derivatization.

| N° | RI   | Compounds                           | <i>Origanum syriacum</i> extracts |     |       |      | <i>Cousinia libanotica</i> extracts |     |       |      |
|----|------|-------------------------------------|-----------------------------------|-----|-------|------|-------------------------------------|-----|-------|------|
|    |      |                                     | CHX                               | DCM | EtOAc | MeOH | CHX                                 | DCM | EtOAc | MeOH |
| 1  | -    | heptane, 2,2,4,6,6-pentamethyl-     | +                                 |     |       |      |                                     |     |       |      |
| 2  | -    | isoterpinolene                      | +                                 |     |       |      |                                     |     |       |      |
| 3  | 1009 | O-cimene                            | +                                 |     |       |      |                                     |     |       |      |
| 4  | 1014 | eucalyptol                          | +                                 |     |       |      |                                     |     |       |      |
| 5  | 1063 | 4-thujanol                          | +                                 |     |       |      |                                     |     |       |      |
| 6  | 1105 | trans-sabinene hydrate              | +                                 |     |       |      |                                     |     |       |      |
| 7  | 1114 | $\alpha$ -monoacetin                |                                   | +   |       |      | +                                   |     |       |      |
| 8  | 1164 | trans-borneol                       | +                                 |     |       |      |                                     |     |       |      |
| 9  | 1194 | terpinen-4-ol                       | +                                 |     |       |      |                                     |     |       |      |
| 10 | 1218 | cuminal                             |                                   |     |       |      | +                                   | +   | ++    |      |
| 11 | 1223 | thymoquinone                        | +                                 | +   |       |      |                                     |     |       |      |
| 12 | 1224 | duroquinone                         |                                   |     |       |      |                                     | +   | ++    |      |
| 13 | 1249 | bicyclohexane                       | +                                 |     |       |      | +                                   |     |       |      |
| 14 | 1254 | benzene, 2-methoxy-1,3,5-trimethyl- |                                   |     |       |      |                                     | +   |       |      |
| 15 | 1256 | thymol                              | ++                                | ++  | +     |      |                                     |     |       |      |
| 16 | 1259 | carvacrol                           | ++                                | ++  | +     |      |                                     |     |       |      |
| 17 | 1408 | 2,3,3-trimethylpentane              |                                   |     |       |      |                                     |     | +     |      |

|    |      |                                                             |     |     |     |     |     |     |     |     |
|----|------|-------------------------------------------------------------|-----|-----|-----|-----|-----|-----|-----|-----|
| 18 | 1417 | <i>trans</i> -caryophyllene                                 | +   | +   |     |     |     |     |     |     |
| 19 | 1434 | cuminyln acetate                                            |     |     |     |     |     |     | +   |     |
| 20 | 1524 | phenol, 2,5-bis(1,1-di-methylethyl)-                        | +   |     |     | ++  |     |     |     |     |
| 21 | 1574 | <i>p</i> -cymene-2,5-diol                                   |     | +   | +   |     | +   |     |     |     |
| 22 | 1585 | (+) spathulenol                                             | +   |     |     |     |     |     |     |     |
| 23 | 1588 | caryophyllene oxide                                         | +++ | +   |     |     |     |     |     |     |
| 24 | 1613 | humulene oxide II                                           | +   |     |     |     |     |     |     |     |
| 25 | 1646 | Cadinol T                                                   | +   |     |     |     |     |     |     |     |
| 26 | 1670 | 14-hydroxycaryo-phyllene                                    | +   | +   |     |     |     |     |     |     |
| 27 | 1785 | loliolide                                                   |     | +   |     |     |     |     |     |     |
| 28 | 1883 | 3,7,11,15-tetramethyl-2-hexadecen-1-ol                      |     | ++  | ++  |     |     |     |     |     |
| 29 | 1930 | methyl palmitate                                            |     |     |     |     |     |     |     | +++ |
| 30 | 1937 | 7,9-di-tert-butyl-1-ox-aspiro(4,5)deca-6,9-diene-2,8-dione  | +   | +++ | +   |     | +   | ++  | +   |     |
| 31 | 1978 | palmitic acid                                               |     |     |     |     |     | ++  | +++ |     |
| 32 | 2005 | Ethyl palmitate                                             |     | +++ | +   |     |     |     | ++  |     |
| 33 | 2115 | phytol                                                      | +   | +   | +   | +++ |     |     |     |     |
| 34 | 2144 | pregna-4,16-diene-3,20-dione                                | +   |     |     |     |     |     |     |     |
| 35 | 2154 | linoleic acid                                               | +   | +   | +   |     |     | +++ | +++ | +   |
| 36 | 2156 | stearic acid                                                | +   | +++ | +   |     |     |     | +   |     |
| 37 | 2160 | oleic acid                                                  |     | +   |     |     |     | +   | ++  |     |
| 38 | 2442 | phenol, 2,2'-meth-ylenebis[6-(1,1-di-methylethyl)-4-methyl- | ++  | +++ | +++ | ++  |     | +++ | ++  | +++ |
| 39 | 2527 | 2-monopalmitin                                              |     | +   |     | ++  |     |     |     |     |
| 40 | 2713 | heptacosane                                                 | +   | +   |     |     | +++ | ++  | +   |     |

|    |             |                                         |     |     |       |      |     |     |       |      |
|----|-------------|-----------------------------------------|-----|-----|-------|------|-----|-----|-------|------|
| 41 | 2725        | $\beta$ -monostearin                    |     |     |       | ++   |     |     |       |      |
| 42 | 2727        | $\alpha$ -monostearin                   |     | +   |       |      |     |     |       |      |
| 43 | 2921        | octacosane                              | ++  | ++  |       |      |     |     |       |      |
| 44 | 2950        | hexatriacontane                         | +++ | +++ | +     |      |     |     |       |      |
| 45 | 2963        | vitamin E                               | +   | +   | +     |      |     | +   | +     |      |
| 46 | 3014        | tetratetracontane                       | +++ | +++ | +     |      |     |     |       |      |
| 47 | 3063        | $\gamma$ -sitosterol                    |     |     |       |      | +   | +   | ++    |      |
| 48 | 3070        | $\beta$ -sitosterol                     | +   | +++ | ++    |      | +   | ++  | ++    |      |
| 49 | -           | $\beta$ -amyirin                        |     |     |       |      | +++ | +   | +     |      |
| 50 | -           | stigmastan-6,22-dien,<br>3,5-dedihydro- |     |     |       |      |     |     |       | +    |
| 51 | -           | lupeol                                  | +   |     |       |      | +++ | +   |       |      |
| 52 | -           | stigmasta-3,5-diene                     |     |     |       |      |     |     |       | ++   |
| 53 | -           | $\beta$ -amyirin acetate                |     |     |       |      | +   |     | +     |      |
| 54 | -           | epilupeol                               |     |     |       |      | +   | ++  | +     |      |
| 55 | -           | 3-epilupeol                             |     |     |       |      |     |     |       | +++  |
| 56 | -           | lupeol acetate                          |     |     |       |      | +   |     |       |      |
| 57 | -           | epilupeol acetate                       |     |     |       |      | +   | +   | +     |      |
|    |             |                                         |     |     |       |      |     |     |       |      |
|    |             |                                         |     |     |       |      |     |     |       |      |
|    |             |                                         |     |     |       |      |     |     |       |      |
|    |             |                                         |     |     |       |      |     |     |       |      |
|    |             |                                         |     |     |       |      |     |     |       |      |
|    |             |                                         |     |     |       |      |     |     |       |      |
|    |             |                                         |     |     |       |      |     |     |       |      |
|    |             |                                         |     |     |       |      |     |     |       |      |
| N° | tR<br>(min) | Compound                                | CHX | DCM | EtOAc | MeCN | CHX | DCM | EtOAc | MeCN |
| 1' | 8.1         | propylene glycol                        |     |     |       |      |     | +   | +     |      |
| 2' | 8.2         | cyclohexanol                            | +   |     |       |      |     |     |       |      |
| 3' | 9.1         | 2,3-butane diol                         |     | +   |       |      |     | +   |       |      |
| 4' | 9.7         | carbamic acid                           |     |     |       |      | +   |     |       |      |
| 5' | 10.0        | hexanoic acid                           | +   |     |       |      | +   | ++  |       |      |
| 6' | 10.3        | glycolic acid                           |     |     |       |      |     | +   |       |      |
| 7' | 10.46       | oct-1-en-3-ol                           | ++  | +   |       |      |     | +   |       |      |
| 8' | 10.48       | 1-butoxy-2-propanol                     |     |     |       |      | +   |     |       |      |
| 9' | 11.2        | octan-3-ol                              | +   | +   |       |      |     |     |       |      |

|     |       |                                                |   |   |   |     |     |     |     |
|-----|-------|------------------------------------------------|---|---|---|-----|-----|-----|-----|
| 10' | 12.4  | levulinic acid                                 |   |   |   |     | +   | +   |     |
| 11' | 13.1  | benzyl alcohol                                 |   |   |   |     | +   |     |     |
| 12' | 15.2  | acetin, bis-1,3-tri-methylether                |   | + |   |     |     |     | +   |
| 13' | 19.3  | benzoic acid                                   |   |   |   |     | +   | +   |     |
| 14' | 21.7  | octanoic acid                                  |   |   |   |     | +   |     |     |
| 15' | 24.2  | 4-isopropylphenol                              |   |   |   | +   |     |     |     |
| 16' | 25.1  | glycerol                                       | + | + | + |     | +   | +   | +   |
| 17' | 31.2  | diacetin, 2-trimethylether                     |   | + |   |     |     | +   |     |
| 18' | 31.8  | 2-butenedioic acid, (E),                       |   |   |   |     | +   |     | +++ |
| 19' | 32.1  | nonanoic acid                                  | + |   |   | +   | +   | +   |     |
| 20' | 32.2  | cuminol                                        | + | + |   | +   | ++  | +   |     |
| 21' | 35.1  | decanoic acid                                  |   |   |   |     | +   | +   |     |
| 22' | 35.2  | 4'-hydroxyacetophenone                         |   |   |   |     | ++  | +++ |     |
| 23' | 36.0  | isopropyl catechol                             |   | + |   |     |     |     |     |
| 24' | 36.1  | 2-tert-Butyl-4-methylphenol                    |   |   |   |     | +   |     |     |
| 25' | 36.2  | malic acid                                     |   |   |   |     | +++ |     | +++ |
| 26' | 36.3  | propyl gallate                                 |   |   |   | +++ | ++  | ++  |     |
| 27' | 36.6  | vanillin                                       |   |   |   |     | +   | +   |     |
| 28' | 36.8  | 2,6-di-tert-butylphenol                        |   | + |   |     |     |     |     |
| 29' | 36.83 | 2,4-di-tert-butylphenol                        |   |   |   |     | +   |     |     |
| 30' | 36.9  | myrtenoic acid                                 |   |   |   | +   | +   | +   |     |
| 31' | 37.0  | $\beta$ -thujaplicin                           | + |   |   |     |     |     |     |
| 32' | 37.3  | tert-Butylhydroquinone                         |   | + |   |     |     |     |     |
| 33' | 37.4  | allyl carbamate                                |   |   |   |     |     | +   |     |
| 34' | 37.6  | 4-hydroxy- $\alpha$ -methylene-benzenemethanol |   |   |   |     | +   |     |     |
| 35' | 37.9  | 3,4-dihydroxybenzaldehyde                      |   | + |   |     |     |     |     |
| 36' | 38.1  | 4-hydroxybenzoic acid                          |   | + |   |     | +   | +++ | +++ |

|     |       |                                                                             |     |   |     |     |     |     |
|-----|-------|-----------------------------------------------------------------------------|-----|---|-----|-----|-----|-----|
| 37' | 38.2  | 5-(7a-isopropenyl-4,5-dimethyl-octahydroinden-4-yl)-3-methyl-pent-2-en-1-ol | +   | + |     |     |     | +   |
| 38' | 38.3  | 4-(acetyloxy)-3-methoxybenzoic acid                                         |     |   |     |     |     | +   |
| 39' | 38.4  | dodecanoic acid                                                             |     |   | +   | +   |     |     |
| 40' | 38.9  | L-(+)-lactic acid                                                           | +   |   |     |     |     |     |
| 41' | 39.1  | syringaldehyde                                                              |     |   |     | +   |     |     |
| 42' | 39.2  | homovanillyl alcohol                                                        |     |   |     | +   |     |     |
| 43' | 39.3  | 9-hydroxynonanoic acid                                                      |     |   |     | +   |     |     |
| 44' | 39.7  | L-(-)-arabitol                                                              |     |   |     |     |     | +++ |
| 45' | 39.9  | vanillic acid                                                               |     | + |     | ++  | +   |     |
| 46' | 40.2  | azealic acid                                                                |     |   | +   | ++  |     |     |
| 47' | 40.7  | myristic acid                                                               | +++ | + | +++ | +++ | +++ |     |
| 48' | 41.1  | 3-phenyllactic acid                                                         |     |   |     |     | +   |     |
| 49' | 41.2  | quininic acid                                                               |     |   | +   |     |     |     |
| 50' | 41.3  | glyoxylic acid monohydrate                                                  |     |   |     |     | +   |     |
| 51' | 41.4  | syringic acid                                                               |     |   | +   | +   | +   |     |
| 52' | 41.47 | D-(-)-fructopyranose                                                        |     |   |     |     |     | +   |
| 53' | 41.6  | $\beta$ -D-(+)-talopyranose                                                 |     |   |     |     |     | +   |
| 54' | 41.7  | 4-coumaric acid                                                             |     |   | +   |     |     |     |
| 55' | 41.78 | pentadecanoic acid                                                          | +   | + | +   | ++  | ++  | +   |
| 56' | 42.0  | mannitol                                                                    |     |   |     |     |     | +++ |
| 57' | 42.2  | myo-inositol                                                                |     |   |     |     |     | +++ |
| 58' | 42.4  | talose                                                                      |     |   |     |     |     | +++ |
| 59' | 42.5  | palmitelaidic acid                                                          | +   | + | +   | +   | +   |     |
| 60' | 43.3  | tuberonic acid                                                              |     | + | +   |     |     |     |
| 61' | 43.6  | heptadecanoic acid                                                          |     |   |     | +   |     |     |

|     |       |                                                         |     |   |     |  |    |     |    |   |     |
|-----|-------|---------------------------------------------------------|-----|---|-----|--|----|-----|----|---|-----|
| 62' | 43.68 | methyl $\alpha$ -D-glucofuranoside                      |     |   |     |  |    |     |    |   | +   |
| 63' | 43.7  | caffeic acid                                            |     |   | +   |  |    |     |    |   |     |
| 64' | 43.8  | methyl galactoside (1S,2R,3S,4S,5R)-                    |     |   |     |  |    |     |    |   | +   |
| 65' | 44.3  | $\alpha$ -linolenic acid                                | +   | + | +   |  | +  | +   |    |   |     |
| 66' | 45.3  | moracin M                                               |     | + |     |  |    |     |    |   |     |
| 67' | 45.9  | D-(+)-galacturonic acid                                 |     |   |     |  |    |     |    |   | +   |
| 68' | 46.0  | thymol-B-D-glucopyranoside                              |     |   |     |  |    |     |    |   | +   |
| 69' | 46.13 | andrographolide                                         |     | + |     |  |    |     |    |   |     |
| 70' | 46.16 | retinol                                                 |     | + |     |  |    |     |    |   |     |
| 71' | 46.18 | arachidic acid                                          |     | + |     |  | ++ | ++  | +  |   |     |
| 72' | 46.3  | prostaglandin E2                                        | +   |   |     |  |    |     |    |   |     |
| 73' | 46.37 | tryptophenolide                                         |     | + |     |  |    |     |    |   |     |
| 74' | 46.93 | heneicosanoic acid                                      |     |   |     |  | +  | +   |    |   |     |
| 75' | 47.13 | 2-palmitoylglycerol                                     |     |   | +   |  | +  |     | ++ |   |     |
| 76' | 47.17 | 1,3-dipalmitin                                          |     |   |     |  |    |     | +  |   |     |
| 77' | 47.3  | 1-monopalmitin                                          | +   | + | +++ |  | ++ | ++  | ++ | + |     |
| 78' | 47.5  | $\beta$ -arabinopyranose                                |     |   |     |  |    |     |    |   | +   |
| 79' | 47.6  | aucubin                                                 |     |   |     |  |    |     |    |   | +   |
| 80' | 47.67 | behenic acid                                            | +++ | + |     |  | +  | +++ | +  |   |     |
| 81' | 47.8  | (10E,15Z)-9,12,13-trihydroxyoctadeca-10,15-dienoic acid |     | + | +   |  |    | +   |    |   |     |
| 82' | 47.9  | D-(+)-turanose                                          |     |   |     |  |    |     |    |   | +   |
| 83' | 48.1  | sucrose                                                 |     |   |     |  |    |     |    |   | +++ |
| 84' | 48.2  | maltose (isomer 2)                                      |     |   |     |  |    |     |    |   | ++  |
| 85' | 48.29 | lactulose                                               |     |   |     |  |    |     |    |   | +   |
| 86' | 48.3  | tricosanoic acid                                        |     |   |     |  |    | +   |    |   |     |
| 87' | 48.4  | tetracosanol                                            |     |   |     |  | +  | +   | +  |   |     |

|      |       |                                                  |     |     |     |  |     |    |     |
|------|-------|--------------------------------------------------|-----|-----|-----|--|-----|----|-----|
| 88'  | 48.5  | 2-monostearin                                    |     |     | +   |  |     |    |     |
| 89'  | 48.58 | 1-monooleoylglycerol                             |     |     |     |  | +   |    | +   |
| 90'  | 48.6  | 1-monolinolein                                   |     |     |     |  |     | ++ |     |
| 91'  | 48.63 | 1,5-anhydroglucitol                              |     |     |     |  |     |    | +   |
| 92'  | 48.69 | D-arabinose                                      |     |     |     |  |     |    | ++  |
| 93'  | 48.7  | glycerol monostearate                            | ++  | +++ | +++ |  | ++  | ++ | ++  |
| 94'  | 48.79 | monostearin                                      |     |     |     |  |     |    | +++ |
| 95'  | 48.92 | lactose                                          |     |     |     |  |     |    | +++ |
| 96'  | 48.93 | 15-tetracosenoic acid,<br>(Z)-                   |     |     |     |  |     | +  |     |
| 97'  | 49.0  | (±)-naringenin                                   |     | +   | +++ |  |     |    |     |
| 98'  | 49.1  | lignoceric acid                                  | +   |     |     |  | +   | ++ | +   |
| 99'  | 49.76 | pentacosanoic acid                               |     |     |     |  |     | +  |     |
| 100' | 49.8  | 1-hexacosanol                                    | ++  |     |     |  | +   |    |     |
| 101' | 50.4  | hexacosanoic acid                                |     |     |     |  | +   | ++ |     |
| 102' | 50.6  | nonacosan-10-ol                                  | +   |     |     |  |     |    |     |
| 103' | 50.7  | 5,7,4'-trihydroxy-8-c-<br>prenyldihydro-flavonol |     |     | +   |  |     |    |     |
| 104' | 50.8  | genistein                                        |     |     |     |  |     |    | +   |
| 105' | 50.9  | 5-hydroxy-7-methoxy-2-<br>methylisoflavone       |     |     | +++ |  |     |    |     |
| 106' | 51.1  | 1-octacosanol                                    |     |     |     |  | +   |    |     |
| 107' | 51.3  | chlorogenic acid                                 |     |     |     |  |     |    | +   |
| 108' | 51.36 | cholesterol                                      |     |     |     |  | +   |    |     |
| 109' | 51.8  | octacosanoic acid                                |     |     |     |  | +   | ++ |     |
| 110' | 52.2  | campesterol                                      | +   | +   |     |  | +   | +  |     |
| 111' | 52.4  | homoeriodictyol chal-<br>cone                    |     | +   |     |  |     |    |     |
| 112' | 52.5  | stigmasterol                                     | +++ | +   |     |  | +   | +  |     |
| 113' | 52.7  | 1-triacontanol                                   |     |     |     |  | +   | +  |     |
| 114' | 53.6  | α – amyrin                                       |     |     |     |  | +++ | +  |     |



|      |      |                                               |     |    |   |
|------|------|-----------------------------------------------|-----|----|---|
| 115' | 54.8 | erythrodiol                                   | +   |    |   |
| 116' | 55.2 | uvaol                                         | +   | +  |   |
| 117' | 55.4 | betulinic alcohol                             | +   |    |   |
| 118' | 55.7 | oleanolic acid                                | +++ | ++ | + |
| 119' | 55.9 | betulinic acid                                | +++ | +  |   |
| 120' | 56.0 | lup-20(29)-en-3-ol,<br>acetate, (3 $\beta$ )- |     |    |   |
|      |      |                                               |     | +  | + |
| 121' | 56.3 | ursolic acid                                  | +   | +  | + |
| 122' | 59.9 | pomolic acid                                  |     | +  |   |

Note: +++: high amount; ++: moderate amount; + : low amount; RI is the retention index determined in regards to a series of n-alkanes (C7–C35) on the apolar DB-5 MS. The RI values are identified as following:  $RI = 100 \times n + 100 \times ((\text{Apex } Rt_{(\text{lower alkane})} - Rt_{(\text{lower alkane})}) / (Rt_{(\text{follower alkane})} - Rt_{(\text{lower alkane})}))$  where n is the number of carbon of lower alkane. The tR is the retention time in minute. Cyclohexane = CHX, Dichloromethane = DCM, Ethyl acetate = EtOAc, acetonitrile = MeCN
